# Supplementary material for: A potent truncated form of human soluble CR1 is protective in a mouse model of renal ischemia–reperfusion injury
Source: PubMed Central journal article supplement (PMC8575974; doi:10.1038/s41598-021-01423-y), 2021-11-08
Supplement: 41598_2021_1423_MOESM1_ESM.pdf [file 41598_2021_1423_MOESM1_ESM.pdf]

**A potent truncated form of human soluble CR1 is protective in a mouse model of renal ischemia-reperfusion injury**

*Anjan K. Bongoni<sup>1†</sup>, Ingela B. Vikstrom<sup>2†</sup>, Jennifer L. McRae<sup>1</sup>, Evelyn J. Salvaris<sup>1</sup>, Nella Fisicaro<sup>1</sup>, Martin J. Pearse<sup>2</sup>, Sandra Wymann<sup>3</sup>, Tony Rowe<sup>2</sup>, Adriana Baz Morelli<sup>2</sup>, Matthew P. Hardy<sup>2‡</sup>, and Peter J. Cowan<sup>1,4‡</sup>*

<sup>1</sup> Immunology Research Centre, St. Vincent's Hospital, Melbourne, VIC 3065, Australia

<sup>2</sup> CSL Limited, Melbourne, VIC 3052, Australia

<sup>3</sup> CSL Behring AG, 3014 Bern, Switzerland

<sup>4</sup> Department of Medicine, University of Melbourne, Melbourne, VIC 3052, Australia

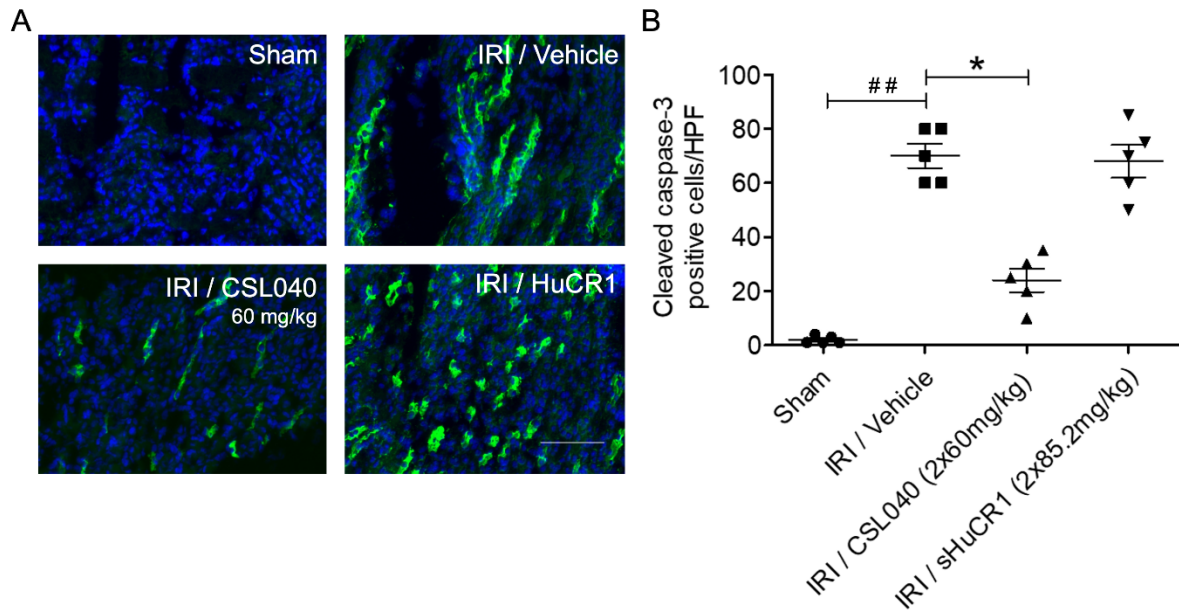

**Supplementary Figure 1. Reduction of IR-induced cleaved caspase-3 positive apoptotic cells by CSL040 treatment.** (A) Representative immunofluorescence images of cleaved caspase-3 positive apoptotic cells in the kidney. Scale bar: 50  $\mu$ m. (B) The numbers of cleaved caspase-3 positive cells were expressed as count per high-power field (HPF), and quantitatively measured by image J analysis. Significance was tested using Mann-Whitney U test ( $^{##}$   $p < 0.01$  for sham vs. IRI/vehicle), and One-way ANOVA Kruskal–Wallis and Dunn multiple comparisons test ( $^*$   $p < 0.05$  for IRI/vehicle vs. IRI/CSL040). The data shown are mean  $\pm$  SEM (n = 5 per group).
